# Supplementary material for: The performance comparison of the decision tree models on the prediction of seismic gravelly soil liquefaction potential based on dynamic penetration test
Source: Frontiers journal article supplement (doi:10.3389/feart.2023.1105610), 2023-07-21
Supplement: Table_1.docx [file Table_1.docx]

**Supplementary Appendix**

Table SA1. Gravelly soil liquefaction case history data.

| **S. No.** | **X1** | **X2 (km)** | **X3 (s)** | **X4** | **X5 (%)** | **X6 (%)** | **X7 (mm)** | **X8** | **X9 (kPa)** | **X10 (m)** | **X11 (m)** | **X12 (m)** | **Liquefied?** |
| --- | --- | --- | --- | --- | --- | --- | --- | --- | --- | --- | --- | --- | --- |
| 1 | 7.9 | 96.30 | 40 | 0.21 | 9 | 9 | 0.5 | 16.01 | 32.00 | 1.5 | 1.5 | 0 | Yes |
| 2 | 7.9 | 94.00 | 40 | 0.24 | 5 | 53 | 6.15 | 10.79 | 49.00 | 0.8 | 0.8 | 0 | Yes |
| 3 | 7.9 | 95.00 | 40 | 0.24 | 4.9 | 50 | 5.9 | 20.91 | 46.00 | 1 | 1.1 | 0 | Yes |
| 4 | 7.9 | 99.60 | 40 | 0.14 | 9 | 0.5 | 0.5 | 7.69 | 68.00 | 2.2 | 2.4 | 0 | Yes |
| 5 | 7.9 | 74.70 | 40 | 0.23 | 9 | 0.4 | 0.51 | 14.94 | 59.00 | 2.2 | 1.5 | 0.7 | Yes |
| 6 | 7.9 | 109.10 | 40 | 0.14 | 9 | 0.5 | 0.15 | 9.43 | 41.00 | 1.8 | 2.8 | 0 | Yes |
| 7 | 7.9 | 94.21 | 40 | 0.21 | 7.5 | 22.8 | 0.7 | 12.14 | 52.00 | 1.9 | 2.4 | 0 | Yes |
| 8 | 7.9 | 95.00 | 40 | 0.20 | 4.9 | 35 | 2.3 | 19.02 | 28.00 | 1 | 1.2 | 0 | Yes |
| 9 | 7.9 | 85.50 | 40 | 0.30 | 4.9 | 39.7 | 1.54 | 12.26 | 83.00 | 3.5 | 2.8 | 0.7 | Yes |
| 10 | 7.9 | 61.10 | 50 | 0.17 | 9 | 22 | 1 | 7.17 | 30.00 | 1.4 | 1 | 0.4 | Yes |
| 11 | 7.9 | 40.29 | 50 | 0.21 | 4.9 | 65 | 15 | 15.56 | 41.00 | 0.9 | 2.1 | 0 | Yes |
| 12 | 7.9 | 138.00 | 110 | 0.24 | 9 | 5 | 0.4 | 9.78 | 49.00 | 1.3 | 1.6 | 0 | Yes |
| 13 | 7.9 | 94.50 | 105 | 0.30 | 4.9 | 76.6 | 31.5 | 19.96 | 77.00 | 3.4 | 3 | 0.4 | Yes |
| 14 | 7.9 | 87.90 | 105 | 0.30 | 1 | 75.4 | 30.57 | 28.25 | 85.00 | 4 | 4 | 0 | Yes |
| 15 | 7.9 | 91.90 | 105 | 0.34 | 3.8 | 57.2 | 11.59 | 14.01 | 82.00 | 2.8 | 4 | 0 | Yes |
| 16 | 7.9 | 77.70 | 105 | 0.49 | 4.9 | 50 | 5.9 | 19.78 | 55.00 | 2.5 | 2.9 | 0 | Yes |
| 17 | 7.9 | 86.36 | 105 | 0.48 | 0 | 51 | 5 | 7.42 | 73.00 | 1.6 | 5 | 0 | Yes |
| 18 | 7.9 | 71.90 | 105 | 0.59 | 4.9 | 35 | 2.3 | 17.57 | 123.00 | 6 | 4.8 | 1.2 | Yes |
| 19 | 7.9 | 78.10 | 105 | 0.42 | 4.9 | 66.8 | 33.4 | 9.50 | 85.00 | 2.4 | 4 | 0 | Yes |
| 20 | 7.9 | 75.99 | 105 | 0.34 | 4.9 | 64.1 | 22 | 10.43 | 37.00 | 1 | 2.6 | 0 | Yes |
| 21 | 7.9 | 76.00 | 105 | 0.33 | 9 | 19 | 0.8 | 13.81 | 69.00 | 2.9 | 4 | 0 | Yes |
| 22 | 7.9 | 78.50 | 105 | 0.37 | 5 | 49 | 4.5 | 12.19 | 71.00 | 3 | 1.5 | 1.5 | Yes |
| 23 | 7.9 | 78.60 | 105 | 0.35 | 4.9 | 60 | 10.9 | 9.64 | 49.00 | 1.5 | 3.2 | 0 | Yes |
| 24 | 7.9 | 73.15 | 105 | 0.39 | 4.9 | 48 | 5.2 | 15.99 | 26.00 | 0.6 | 2.8 | 0 | Yes |
| 25 | 7.9 | 88.60 | 105 | 0.29 | 4.9 | 63.7 | 12.8 | 15.20 | 60.00 | 2.8 | 1.2 | 1.6 | Yes |
| 26 | 7.9 | 64.22 | 150 | 0.59 | 4.9 | 50 | 5.9 | 22.47 | 32.00 | 1.2 | 1.4 | 0 | Yes |
| 27 | 7.9 | 63.50 | 150 | 0.41 | 4.9 | 50 | 5.9 | 14.67 | 42.00 | 1.5 | 1.2 | 0.3 | Yes |
| 28 | 7.9 | 77.90 | 150 | 0.29 | 4.9 | 74 | 25 | 15.73 | 31.00 | 0.9 | 0.7 | 0.2 | Yes |
| 29 | 7.9 | 152.73 | 90 | 0.52 | 4.9 | 50 | 5.9 | 19.01 | 66.00 | 2.4 | 1.7 | 0.7 | Yes |
| 30 | 7.9 | 22.70 | 70 | 0.25 | 4.9 | 85 | 52.1 | 22.02 | 47.00 | 2.1 | 1 | 1.1 | Yes |
| 31 | 7.9 | 25.70 | 70 | 0.24 | 4.5 | 4.8 | 0.35 | 20.34 | 24.00 | 0.9 | 1 | 0 | Yes |
| 32 | 7.9 | 36.00 | 70 | 0.25 | 4.9 | 45 | 4.3 | 11.04 | 33.00 | 1.4 | 1.4 | 0 | Yes |
| 33 | 7.9 | 74.50 | 70 | 0.22 | 9.9 | 26.1 | 0.98 | 9.67 | 61.00 | 1.4 | 2.3 | 0 | Yes |
| 34 | 7.9 | 44.02 | 70 | 0.24 | 4.9 | 59 | 10.3 | 11.60 | 61.00 | 2.4 | 3.1 | 0 | Yes |
| 35 | 7.9 | 161.00 | 48.1 | 0.13 | 9 | 46 | 9 | 21.73 | 41.00 | 1.8 | 2.3 | 0.9 | Yes |
| 36 | 7.9 | 219.10 | 48.1 | 0.09 | 9 | 46 | 9 | 6.66 | 55.00 | 1 | 2.3 | 0.9 | Yes |
| 37 | 6.9 | 12.00 | 10.9 | 0.29 | 2 | 70 | 16 | 6.74 | 27.80 | 0.8 | 2.3 | 0.9 | Yes |
| 38 | 6.9 | 12.00 | 10.9 | 0.29 | 2 | 70 | 16 | 6.66 | 28.70 | 0.8 | 2.3 | 0.9 | Yes |
| 39 | 6.9 | 89.50 | 10.9 | 0.30 | 3 | 63 | 13.2 | 7.78 | 37.30 | 1.2 | 2.3 | 0.9 | Yes |
| 40 | 6.9 | 89.50 | 10.9 | 0.30 | 3 | 63 | 13.2 | 5.33 | 37.40 | 1.2 | 2.3 | 0.9 | Yes |
| 41 | 6.9 | 9.20 | 10.9 | 0.36 | 1 | 66 | 15 | 7.40 | 46.20 | 1.7 | 2.3 | 0.9 | Yes |
| 42 | 6.9 | 9.20 | 10.9 | 0.36 | 4 | 70 | 20.4 | 7.53 | 44.70 | 1.5 | 2.3 | 0.9 | Yes |
| 43 | 6.9 | 9.20 | 10.9 | 0.36 | 1 | 55 | 8 | 8.30 | 36.80 | 1.4 | 2.3 | 0.9 | Yes |
| 44 | 6.9 | 9.20 | 10.9 | 0.36 | 1 | 41 | 2.5 | 7.16 | 49.40 | 1.8 | 2.3 | 0.9 | Yes |
| 45 | 6.9 | 9.20 | 10.9 | 0.36 | 2 | 58 | 9.7 | 7.45 | 45.60 | 1.5 | 2.3 | 0.9 | Yes |
| 46 | 6.9 | 9.20 | 10.9 | 0.36 | 4 | 54 | 7.5 | 8.88 | 46.30 | 2 | 2.3 | 0.9 | Yes |
| 47 | 6.9 | 9.20 | 10.9 | 0.36 | 4 | 54 | 7.5 | 10.53 | 32.90 | 1.5 | 2.3 | 0.9 | Yes |
| 48 | 6.9 | 9.20 | 10.9 | 0.36 | 4 | 54 | 7.5 | 10.61 | 32.40 | 1.5 | 2.3 | 0.9 | Yes |
| 49 | 6.9 | 9.20 | 10.9 | 0.36 | 4 | 54 | 7.5 | 10.39 | 33.80 | 1.5 | 2.3 | 0.9 | Yes |
| 50 | 6.9 | 9.20 | 10.9 | 0.36 | 4 | 54 | 7.5 | 9.76 | 38.30 | 1.7 | 2.3 | 0.9 | Yes |
| 51 | 6.9 | 9.20 | 10.9 | 0.36 | 4 | 54 | 7.5 | 9.60 | 46.80 | 1.5 | 2.3 | 0.9 | Yes |
| 52 | 6.9 | 9.20 | 10.9 | 0.35 | 2 | 49 | 5.4 | 8.10 | 38.60 | 1.65 | 2.3 | 0.9 | Yes |
| 53 | 6.9 | 9.20 | 10.9 | 0.35 | 3 | 57 | 9 | 8.77 | 32.90 | 1.45 | 2.3 | 0.9 | Yes |
| 54 | 6.9 | 9.20 | 10.9 | 0.35 | 7 | 72 | 18 | 9.51 | 28.00 | 1.35 | 2.3 | 0.9 | Yes |
| 55 | 6.9 | 9.20 | 10.9 | 0.35 | 1 | 49 | 5.6 | 10.36 | 23.60 | 1.1 | 2.3 | 0.9 | Yes |
| 56 | 6.9 | 14.20 | 10.9 | 0.60 | 12 | 67 | 17 | 27.40 | 17.00 | 1 | 2.3 | 0.9 | Yes |
| 57 | 6.9 | 14.20 | 10.9 | 0.35 | 2 | 48 | 5.2 | 13.11 | 36.60 | 1.52 | 2.3 | 0.9 | Yes |
| 58 | 6.9 | 14.20 | 10.9 | 0.60 | 24 | 39 | 3 | 4.99 | 119.30 | 7 | 2.3 | 0.9 | Yes |
| 59 | 6.9 | 14.20 | 10.9 | 0.60 | 20 | 42 | 3.6 | 4.93 | 180.20 | 9.36 | 2.3 | 0.9 | Yes |
| 60 | 6.9 | 14.20 | 10.9 | 0.50 | 21 | 59 | 10 | 19.57 | 37.40 | 0.8 | 2.3 | 0.9 | Yes |
| 61 | 6.9 | 14.20 | 10.9 | 0.50 | 30 | 33 | 2 | 11.84 | 54.20 | 2.4 | 2.3 | 0.9 | Yes |
| 62 | 6.9 | 14.20 | 10.9 | 0.50 | 21 | 63 | 13 | 5.55 | 131.00 | 6.7 | 2.3 | 0.9 | Yes |
| 63 | 6.9 | 14.20 | 10.9 | 0.50 | 20 | 40 | 3 | 16.90 | 29.10 | 0.8 | 0.8 | 0 | Yes |
| 64 | 6.9 | 14.20 | 10.9 | 0.50 | 30 | 35 | 2.3 | 13.37 | 51.00 | 2.4 | 1 | 1.4 | Yes |
| 65 | 6.9 | 14.20 | 10.9 | 0.50 | 20 | 63 | 13 | 6.42 | 124.00 | 6.8 | 4.6 | 2.2 | Yes |
| 66 | 6.9 | 13.00 | 10.9 | 0.50 | 10 | 61 | 11 | 19.34 | 39.00 | 0.8 | 2.3 | 0.9 | Yes |
| 67 | 6.9 | 13.00 | 10.9 | 0.50 | 10 | 61 | 11 | 14.62 | 38.40 | 0.8 | 2.3 | 0.9 | Yes |
| 68 | 6.9 | 13.00 | 10.9 | 0.50 | 10 | 61 | 11 | 20.56 | 40.50 | 0.8 | 2.3 | 0.9 | Yes |
| 69 | 6.9 | 30.50 | 15.7 | 0.50 | 18 | 40 | 3.1 | 8.68 | 62.80 | 2.1 | 2.3 | 0.9 | Yes |
| 70 | 6.9 | 30.50 | 15.7 | 0.58 | 16 | 30 | 1.7 | 3.51 | 64.60 | 1.8 | 2.3 | 0.9 | Yes |
| 71 | 6.9 | 30.50 | 15.7 | 0.63 | 12 | 50 | 5.9 | 8.40 | 94.20 | 4.3 | 2.3 | 0.9 | Yes |
| 72 | 6.9 | 30.50 | 15.7 | 0.65 | 9 | 50 | 5.9 | 7.10 | 96.70 | 3.2 | 2.3 | 0.9 | Yes |
| 73 | 6.9 | 30.50 | 15.7 | 0.65 | 12 | 40 | 3.1 | 7.91 | 77.80 | 2.5 | 2.3 | 0.9 | Yes |
| 74 | 6.9 | 89.50 | 48.1 | 0.50 | 10 | 30 | 1.7 | 4.10 | 54.60 | 1.5 | 2.3 | 0.9 | Yes |
| 75 | 6.9 | 20.09 | 13.44 | 0.50 | 13 | 30 | 1.2 | 6.34 | 116.30 | 3 | 4 | 0 | Yes |
| 76 | 6.9 | 20.09 | 13.44 | 0.50 | 10 | 30 | 1.7 | 10.02 | 93.00 | 2.4 | 2.3 | 0.9 | Yes |
| 77 | 6.9 | 20.09 | 13.44 | 0.50 | 10 | 30 | 1.7 | 6.91 | 90.40 | 2.4 | 2.3 | 0.9 | Yes |
| 78 | 7.9 | 44.13 | 20.1 | 0.36 | 4.9 | 60 | 10.9 | 6.24 | 61.90 | 2.4 | 2.3 | 0.9 | Yes |
| 79 | 7.9 | 44.13 | 20.1 | 0.36 | 4.9 | 60 | 10.9 | 9.12 | 58.00 | 2.4 | 2.3 | 0.9 | Yes |
| 80 | 7.9 | 44.13 | 20.1 | 0.36 | 4.9 | 60 | 10.9 | 10.20 | 58.00 | 2.4 | 2.3 | 0.9 | Yes |
| 81 | 7.9 | 44.13 | 20.1 | 0.36 | 4.9 | 60 | 10.9 | 11.44 | 61.90 | 2.4 | 2.3 | 0.9 | Yes |
| 82 | 7.5 | 177.00 | 39 | 0.12 | 10 | 22 | 1 | 5.99 | 50.20 | 1.6 | 0 | 0.4 | Yes |
| 83 | 7.5 | 177.00 | 39 | 0.12 | 10 | 22 | 1 | 10.01 | 56.80 | 2.51 | 0 | 1 | Yes |
| 84 | 7.6 | 19.60 | 41 | 0.43 | 14 | 53 | 6.1 | 7.11 | 50.58 | 1.2 | 1.2 | 0 | Yes |
| 85 | 7.6 | 34.76 | 43.85 | 0.79 | 21 | 18 | 0.8 | 10.78 | 93.50 | 3.5 | 2.3 | 0.9 | Yes |
| 86 | 7.6 | 27.00 | 43 | 0.79 | 3 | 53 | 8 | 10.03 | 86.20 | 4.5 | 0.5 | 0 | Yes |
| 87 | 9 | 359.24 | 95.7 | 0.36 | 7 | 13 | 0.6 | 8.54 | 99.70 | 4.5 | 5.55 | 0 | Yes |
| 88 | 9 | 366.76 | 97.4 | 0.38 | 7.3 | 33 | 2 | 12.75 | 133.80 | 3.61 | 4.7 | 0 | Yes |
| 89 | 9 | 301.93 | 121.6 | 0.84 | 8 | 13 | 0.6 | 9.06 | 144.40 | 7.1 | 2.1 | 0.3 | Yes |
| 90 | 9 | 298.01 | 115.8 | 0.77 | 6.45 | 27 | 1.4 | 8.68 | 107.55 | 4.8 | 0.3 | 1.8 | Yes |
| 91 | 8.3 | 153.00 | 37.3 | 0.19 | 3 | 70 | 30 | 2.62 | 30.40 | 1 | 1 | 0 | Yes |
| 92 | 8.3 | 122.00 | 32.6 | 0.19 | 4.9 | 58 | 9 | 6.11 | 70.00 | 0.7 | 3.7 | 0 | Yes |
| 93 | 9.2 | 95.00 | 77 | 0.21 | 6 | 56 | 8.38 | 15.54 | 52.90 | 0 | 2.3 | 0.9 | Yes |
| 94 | 9.2 | 95.00 | 77 | 0.21 | 10 | 29 | 1.62 | 6.82 | 103.00 | 0 | 2.3 | 0.9 | Yes |
| 95 | 7.9 | 92.24 | 40 | 0.24 | 5 | 40 | 3.1 | 11.44 | 154.00 | 4.7 | 4.1 | 0.6 | No |
| 96 | 7.9 | 99.00 | 40 | 0.18 | 4.9 | 54.9 | 7.57 | 14.61 | 65.00 | 2 | 0.6 | 1.4 | No |
| 97 | 7.9 | 86.00 | 40 | 0.32 | 4.9 | 60.9 | 9.43 | 22.58 | 106.00 | 4.5 | 2.6 | 1.9 | No |
| 98 | 7.9 | 95.00 | 40 | 0.20 | 9 | 20 | 0.9 | 12.14 | 131.00 | 5 | 3.1 | 1.9 | No |
| 99 | 7.9 | 88.20 | 40 | 0.20 | 4.9 | 75.4 | 23.2 | 20.02 | 128.00 | 6.1 | 3.6 | 2.5 | No |
| 100 | 7.9 | 93.50 | 40 | 0.18 | 4.9 | 50 | 5.9 | 23.48 | 134.00 | 3.7 | 2.9 | 0.8 | No |
| 101 | 7.9 | 85.50 | 40 | 0.25 | 4.9 | 68.6 | 15.89 | 16.91 | 111.00 | 3.7 | 0 | 3.7 | No |
| 102 | 7.9 | 81.46 | 50 | 0.21 | 4.9 | 80 | 38.1 | 35.76 | 63.00 | 3 | 0 | 3 | No |
| 103 | 7.9 | 129.60 | 110 | 0.20 | 4.9 | 30 | 1.68 | 17.51 | 96.00 | 4.1 | 3.5 | 0.6 | No |
| 104 | 7.9 | 100.00 | 105 | 0.30 | 4.9 | 65 | 15 | 62.12 | 45.00 | 0.8 | 0.5 | 0.3 | No |
| 105 | 7.9 | 88.00 | 105 | 0.41 | 5 | 70 | 20.4 | 17.98 | 163.00 | 8 | 2 | 6 | No |
| 106 | 7.9 | 80.92 | 105 | 0.48 | 4.9 | 50 | 5.9 | 21.40 | 112.00 | 2 | 4.2 | 0 | No |
| 107 | 7.9 | 87.00 | 105 | 0.47 | 4.9 | 60 | 10.9 | 24.36 | 100.00 | 4.3 | 3.2 | 1.1 | No |
| 108 | 7.9 | 84.42 | 105 | 0.43 | 4.9 | 90 | 71.2 | 45.64 | 85.00 | 4 | 4 | 0 | No |
| 109 | 7.9 | 78.00 | 105 | 0.43 | 5 | 50 | 5.9 | 14.49 | 122.00 | 6.2 | 4.1 | 2.1 | No |
| 110 | 7.9 | 82.20 | 105 | 0.37 | 4.9 | 50 | 5.9 | 15.58 | 83.00 | 3.4 | 2.1 | 1.3 | No |
| 111 | 7.9 | 73.20 | 105 | 0.41 | 4 | 50 | 5.9 | 36.66 | 106.00 | 1.4 | 3.8 | 0 | No |
| 112 | 7.9 | 90.10 | 105 | 0.27 | 9 | 25.8 | 0.59 | 23.59 | 61.00 | 2 | 2.3 | 0 | No |
| 113 | 7.9 | 73.30 | 150 | 0.26 | 4.9 | 50 | 5.9 | 19.89 | 155.00 | 6 | 2 | 4 | No |
| 114 | 7.9 | 152.70 | 90 | 0.52 | 4.9 | 50 | 5.9 | 17.78 | 89.00 | 3 | 1.1 | 1.9 | No |
| 115 | 7.9 | 32.80 | 70 | 0.20 | 4.9 | 87 | 59 | 14.70 | 38.00 | 1.5 | 1.9 | 0 | No |
| 116 | 7.9 | 20.30 | 70 | 0.27 | 4.9 | 50 | 5.9 | 24.43 | 55.00 | 2.3 | 2.1 | 0.2 | No |
| 117 | 7.9 | 20.60 | 70 | 0.31 | 4.9 | 40 | 3.1 | 44.86 | 116.00 | 5.4 | 0 | 5.4 | No |
| 118 | 7.9 | 16.87 | 70 | 0.37 | 4.9 | 60 | 10.9 | 28.56 | 68.00 | 3 | 1 | 2 | No |
| 119 | 7.9 | 18.43 | 70 | 0.32 | 4.9 | 40 | 3.1 | 39.43 | 33.00 | 1.5 | 0.8 | 0.7 | No |
| 120 | 7.9 | 19.10 | 70 | 0.31 | 4.9 | 75 | 27.9 | 30.55 | 61.00 | 2.7 | 0 | 2.7 | No |
| 121 | 7.9 | 50.60 | 70 | 0.26 | 4.9 | 65 | 15 | 38.37 | 33.00 | 1.4 | 1 | 0.4 | No |
| 122 | 7.9 | 50.25 | 70 | 0.18 | 4.9 | 90 | 71.2 | 28.31 | 59.00 | 2.1 | 3.6 | 0 | No |
| 123 | 7.9 | 50.10 | 70 | 0.20 | 4.9 | 80 | 38.1 | 29.45 | 53.00 | 2.4 | 2.2 | 0.2 | No |
| 124 | 7.9 | 56.20 | 70 | 0.18 | 4.9 | 80 | 38.1 | 30.65 | 103.00 | 4 | 1.6 | 2.4 | No |
| 125 | 7.9 | 65.80 | 70 | 0.17 | 4.9 | 75 | 27.9 | 27.45 | 98.00 | 3.4 | 1.6 | 1.8 | No |
| 126 | 6.9 | 17.80 | 10.9 | 0.23 | 6 | 23 | 1.1 | 45.91 | 52.30 | 2.3 | 2.3 | 0.9 | No |
| 127 | 6.9 | 89.50 | 10.9 | 0.46 | 4.9 | 62 | 12.4 | 29.64 | 36.00 | 1 | 2.3 | 0.9 | No |
| 128 | 6.9 | 89.50 | 10.9 | 0.46 | 4.9 | 62 | 12.4 | 37.55 | 69.20 | 3 | 2.3 | 0.9 | No |
| 129 | 6.9 | 9.20 | 10.9 | 0.35 | 2 | 61 | 12 | 24.48 | 51.80 | 1.65 | 2.3 | 0.9 | No |
| 130 | 6.9 | 9.20 | 10.9 | 0.35 | 5 | 44 | 4.1 | 25.14 | 49.10 | 1.45 | 2.3 | 0.9 | No |
| 131 | 6.9 | 9.20 | 10.9 | 0.35 | 17 | 54 | 7.5 | 25.89 | 46.30 | 1.35 | 2.3 | 0.9 | No |
| 132 | 6.9 | 9.20 | 10.9 | 0.35 | 17 | 54 | 7.5 | 21.50 | 67.10 | 1.85 | 2.3 | 0.9 | No |
| 133 | 6.9 | 9.20 | 10.9 | 0.35 | 3 | 61 | 12 | 27.28 | 41.70 | 1.1 | 2.3 | 0.9 | No |
| 134 | 6.9 | 14.20 | 10.9 | 0.50 | 15 | 78 | 34 | 15.76 | 70.70 | 0.8 | 2.3 | 0.9 | No |
| 135 | 6.9 | 53.00 | 19.1 | 0.12 | 10 | 50 | 5.9 | 5.06 | 83.40 | 2 | 2 | 0 | No |
| 136 | 6.9 | 53.00 | 19.1 | 0.12 | 10 | 50 | 5.9 | 6.18 | 101.00 | 2 | 2 | 0 | No |
| 137 | 6.9 | 34.00 | 16.3 | 0.63 | 7 | 50 | 5.9 | 8.19 | 93.80 | 3.7 | 2.3 | 0.9 | No |
| 138 | 6.9 | 34.00 | 16.3 | 0.53 | 8 | 50 | 5.9 | 20.96 | 49.00 | 2 | 2.3 | 0.9 | No |
| 139 | 6.9 | 34.00 | 16.3 | 0.63 | 11 | 40 | 3.1 | 5.96 | 60.00 | 2.9 | 2.3 | 0.9 | No |
| 140 | 6.9 | 34.00 | 16.3 | 0.65 | 2 | 30 | 1.7 | 7.79 | 74.00 | 2.2 | 2.3 | 0.9 | No |
| 141 | 6.9 | 20.09 | 13.44 | 0.50 | 6 | 30 | 1.7 | 10.67 | 126.40 | 3.2 | 0 | 3.2 | No |
| 142 | 6.9 | 20.09 | 13.44 | 0.50 | 5 | 30 | 1.7 | 8.07 | 129.30 | 3.2 | 0 | 3.2 | No |
| 143 | 6.9 | 89.50 | 44 | 0.45 | 10 | 30 | 1.7 | 7.76 | 136.90 | 7 | 0 | 7 | No |
| 144 | 6.9 | 89.50 | 44 | 0.40 | 10 | 30 | 1.7 | 5.45 | 115.40 | 7 | 0 | 7 | No |
| 145 | 7 | 44.13 | 19.76 | 0.18 | 4.9 | 60 | 10.9 | 6.24 | 61.90 | 2.4 | 2.3 | 0.9 | No |
| 146 | 7 | 44.13 | 19.76 | 0.18 | 4.9 | 60 | 10.9 | 9.12 | 58.00 | 2.4 | 2.3 | 0.9 | No |
| 147 | 7 | 44.13 | 19.76 | 0.18 | 4.9 | 60 | 10.9 | 10.20 | 58.00 | 2.4 | 2.3 | 0.9 | No |
| 148 | 7 | 44.13 | 19.76 | 0.18 | 4.9 | 60 | 10.9 | 10.79 | 61.90 | 2.4 | 2.3 | 0.9 | No |
| 149 | 7.5 | 177.00 | 39 | 0.12 | 10 | 19 | 1 | 8.78 | 70.15 | 3.35 | 3.6 | 0 | No |
| 150 | 7.6 | 14.69 | 41 | 0.43 | 15.3 | 41 | 3.43 | 10.61 | 71.70 | 1.5 | 0 | 1.5 | No |
| 151 | 7.6 | 14.69 | 41 | 0.43 | 20.5 | 45 | 4.36 | 13.99 | 84.00 | 1.8 | 5.8 | 0 | No |
| 152 | 7.6 | 24.17 | 41 | 0.43 | 19 | 13 | 0.6 | 14.15 | 97.46 | 1.7 | 0 | 1.7 | No |
| 153 | 7.6 | 19.34 | 41 | 0.43 | 16 | 45 | 2.9 | 18.54 | 216.12 | 4 | 1.4 | 0 | No |
| 154 | 7.6 | 19.81 | 41 | 0.43 | 19 | 46 | 1.5 | 8.47 | 130.14 | 5 | 0 | 5 | No |
| 155 | 7.6 | 19.81 | 41 | 0.43 | 22 | 9 | 0.17 | 18.76 | 202.67 | 2.8 | 4.6 | 0 | No |
| 156 | 7.6 | 19.82 | 41 | 0.43 | 20 | 42 | 1.4 | 17.51 | 181.01 | 0.65 | 1.8 | 0 | No |
| 157 | 7.6 | 18.55 | 41 | 0.43 | 11 | 57 | 10 | 11.67 | 138.27 | 5 | 4.3 | 0.7 | No |
| 158 | 7.6 | 20.25 | 41 | 0.43 | 26 | 2 | 0.29 | 15.86 | 276.77 | 9.6 | 1.4 | 0 | No |
| 159 | 7.6 | 17.14 | 41 | 0.43 | 16 | 46 | 4.5 | 12.11 | 85.12 | 2.4 | 0 | 2.4 | No |
| 160 | 7.6 | 19.45 | 41 | 0.43 | 16 | 55 | 7 | 6.46 | 199.70 | 1.5 | 9 | 0 | No |
| 161 | 7.6 | 27.00 | 43.85 | 0.79 | 9 | 31 | 1.8 | 17.35 | 97.99 | 5.1 | 0 | 5.1 | No |
| 162 | 7.6 | 32.26 | 43.85 | 0.79 | 16 | 5 | 0.36 | 16.06 | 127.44 | 1.3 | 0 | 1.3 | No |
| 163 | 9.2 | 75.00 | 75 | 0.31 | 2 | 31 | 1.84 | 28.71 | 25.00 | 0 | 2.3 | 0.9 | Yes |
| 164 | 9.2 | 75.00 | 75 | 0.31 | 20 | 31 | 1.84 | 9.34 | 79.30 | 4.42 | 2.3 | 0.9 | Yes |
| 165 | 9.2 | 75.00 | 75 | 0.31 | 7 | 49 | 5.58 | 8.20 | 59.00 | 3.05 | 2.3 | 0.9 | Yes |
| 166 | 6.4 | 22.00 | 3.5 | 0.20 | 15 | 35 | 2 | 10.99 | 87.60 | 2.7 | 0.07 | 0 | Yes |
| 167 | 6.8 | 15.50 | 10 | 0.20 | 19 | 47 | 4 | 7.40 | 19.90 | 0.2 | 0.4 | 0 | Yes |
| 168 | 7.8 | 81.00 | 20 | 0.15 | 4.9 | 52 | 6 | 3.84 | 36.70 | 1.3 | 2.3 | 0.9 | Yes |
| 169 | 7.4 | 20.08 | 17.55 | 0.30 | 5 | 51 | 6.4 | 22.34 | 17.31 | 0.5 | 2.3 | 0.9 | Yes |
| 170 | 7.4 | 20.08 | 17.55 | 0.40 | 1 | 56 | 8.4 | 21.30 | 22.20 | 1.25 | 2.3 | 0.9 | Yes |
| 171 | 7.4 | 20.08 | 17.55 | 0.40 | 5 | 39 | 3 | 20.31 | 27.80 | 0.75 | 0.85 | 0 | Yes |
| 172 | 7.4 | 20.08 | 17.55 | 0.40 | 5 | 39 | 3 | 29.64 | 23.50 | 0.75 | 1.2 | 0 | Yes |
| 173 | 7.4 | 20.08 | 17.55 | 0.40 | 2 | 39 | 3 | 19.70 | 33.80 | 0.3 | 1.1 | 0 | Yes |
| 174 | 7.4 | 20.08 | 17.55 | 0.40 | 8 | 22 | 1 | 9.63 | 64.10 | 0.75 | 1 | 0 | Yes |
| 175 | 7.4 | 20.08 | 17.55 | 0.40 | 5 | 39 | 3 | 18.76 | 40.80 | 0 | 0.8 | 0 | Yes |
| 176 | 7.4 | 20.08 | 17.55 | 0.50 | 5 | 33 | 2 | 30.57 | 11.80 | 0.5 | 0.6 | 0 | Yes |
| 177 | 7.4 | 20.08 | 17.55 | 0.40 | 2 | 39 | 3 | 11.68 | 73.80 | 0.4 | 4 | 0 | Yes |
| 178 | 7.4 | 20.08 | 17.55 | 0.40 | 14 | 22 | 1 | 17.89 | 35.10 | 1.3 | 1.3 | 0 | Yes |
| 179 | 9.2 | 67.00 | 26.5 | 0.44 | 9 | 46 | 9 | 7.77 | 89.00 | 1 | 2.3 | 1 | Yes |
| 180 | 9.2 | 67.00 | 26.5 | 0.44 | 9 | 46 | 9 | 2.36 | 58.60 | 0.8 | 2.3 | 0.8 | Yes |
| 181 | 9.2 | 67.00 | 26.5 | 0.44 | 9 | 46 | 9 | 13.51 | 70.80 | 1 | 2.3 | 1 | Yes |
| 182 | 9.2 | 67.00 | 26.5 | 0.44 | 9 | 46 | 9 | 3.10 | 85.60 | 1 | 2.3 | 1 | Yes |
| 183 | 6.4 | 22.00 | 3.5 | 0.47 | 13 | 21 | 1.2 | 14.60 | 25.00 | 0.2 | 1.2 | 0 | Yes |
| 184 | 6.4 | 22.00 | 3.5 | 0.47 | 9 | 46 | 9 | 11.15 | 16.50 | 0.2 | 1 | 0 | Yes |
| 185 | 6.4 | 22.00 | 3.5 | 0.47 | 9 | 46 | 9 | 18.21 | 30.60 | 0.2 | 1 | 0 | Yes |
| 186 | 6.9 | 14.20 | 10.9 | 0.60 | 9 | 46 | 9 | 25.46 | 215.00 | 7.5 | 3.5 | 4 | Yes |
| 187 | 6.9 | 13.00 | 10.9 | 0.50 | 9 | 46 | 9 | 10.83 | 36.50 | 0.7 | 2.3 | 0.9 | Yes |
| 188 | 6.9 | 9.20 | 10.9 | 0.39 | 9 | 46 | 9 | 13.86 | 41.80 | 1.4 | 2.3 | 0.9 | Yes |
| 189 | 7.8 | 140.00 | 34.2 | 0.46 | 9 | 46 | 9 | 8.73 | 96.10 | 3.8 | 2.7 | 1.1 | Yes |
| 190 | 7.8 | 140.00 | 34.2 | 0.46 | 9 | 46 | 9 | 9.88 | 93.20 | 3.6 | 2.1 | 1.5 | Yes |
| 191 | 7.8 | 140.00 | 34.2 | 0.46 | 9 | 46 | 9 | 7.69 | 97.30 | 3.8 | 2.2 | 1.6 | Yes |
| 192 | 7.8 | 89.50 | 48.1 | 0.24 | 9 | 46 | 9 | 3.23 | 86.50 | 2.6 | 2.6 | 0 | Yes |
| 193 | 7.8 | 89.50 | 48.1 | 0.24 | 9 | 46 | 9 | 4.09 | 68.50 | 2.8 | 2.8 | 0 | Yes |
| 194 | 7.9 | 74.70 | 40 | 0.23 | 9 | 0.4 | 0.51 | 14.57 | 62.00 | 2.2 | 1.5 | 0.7 | Yes |
| 195 | 7.9 | 109.10 | 40 | 0.14 | 9 | 0.5 | 0.15 | 8.30 | 53.00 | 1.8 | 2.8 | 0 | Yes |
| 196 | 7.9 | 94.21 | 40 | 0.21 | 9 | 46 | 9 | 11.72 | 68.00 | 1.9 | 2.4 | 0 | Yes |
| 197 | 7.9 | 95.00 | 40 | 0.20 | 9 | 46 | 9 | 13.88 | 58.00 | 1 | 1.8 | 0 | Yes |
| 198 | 7.9 | 91.90 | 105 | 0.34 | 3.8 | 57.2 | 11.59 | 13.60 | 87.00 | 2.8 | 4 | 0 | Yes |
| 199 | 7.9 | 64.22 | 150 | 0.59 | 9 | 46 | 9 | 22.57 | 43.00 | 1.2 | 1.2 | 0 | Yes |
| 200 | 7.9 | 71.90 | 105 | 0.59 | 9 | 46 | 9 | 8.31 | 111.00 | 3.7 | 3 | 0.7 | Yes |
| 201 | 7.9 | 63.50 | 150 | 0.41 | 9 | 46 | 9 | 15.49 | 84.00 | 3.2 | 2.9 | 0.3 | Yes |
| 202 | 7.9 | 87.90 | 105 | 0.30 | 9 | 46 | 9 | 16.06 | 107.00 | 4 | 4 | 0 | Yes |
| 203 | 7.9 | 86.36 | 105 | 0.48 | 9 | 46 | 9 | 6.72 | 73.00 | 1.6 | 5 | 0 | Yes |
| 204 | 7.9 | 77.70 | 105 | 0.49 | 9 | 46 | 9 | 15.41 | 96.00 | 2.5 | 2.9 | 0 | Yes |
| 205 | 7.6 | 30.80 | 37.175 | 0.19 | 28 | 47 | 4.8 | 13.62 | 248.40 | 7 | 3.6 | 0 | No |
| 206 | 7.6 | 27.65 | 37.175 | 0.19 | 15 | 45 | 3 | 16.47 | 139.92 | 1.6 | 0.5 | 0 | No |
| 207 | 7.6 | 24.33 | 37.175 | 0.19 | 10 | 55 | 7.5 | 14.56 | 153.29 | 1.2 | 0 | 1.2 | No |
| 208 | 9 | 386.48 | 69.9 | 0.14 | 0 | 33 | 2 | 16.37 | 185.00 | 0.32 | 2.9 | 0 | No |
| 209 | 9 | 403.78 | 83.1 | 0.20 | 0 | 33 | 2 | 17.19 | 129.50 | 1.75 | 1.6 | 0 | No |
| 210 | 9 | 417.87 | 71.4 | 0.18 | 4 | 55 | 7.8 | 9.51 | 220.90 | 11.7 | 2 | 0 | No |
| 211 | 9 | 417.83 | 71.4 | 0.18 | 8 | 37 | 2.6 | 11.59 | 157.70 | 8.5 | 2.95 | 1.25 | No |
| 212 | 9 | 403.54 | 73.9 | 0.20 | 17 | 46 | 0.153 | 14.97 | 219.80 | 9 | 1.2 | 0 | No |
| 213 | 9 | 310.16 | 46.7 | 0.20 | 0 | 33 | 2 | 15.61 | 125.44 | 1.15 | 3.9 | 0 | No |
| 214 | 9 | 365.72 | 80.4 | 0.38 | 45.3 | 25 | 1.25 | 15.79 | 121.60 | 2.4 | 5.1 | 0 | No |
| 215 | 9 | 291.89 | 115.8 | 0.77 | 0 | 33 | 2 | 12.61 | 161.25 | 4.5 | 4.3 | 0 | No |
| 216 | 9 | 456.38 | 26.5 | 0.09 | 0 | 73 | 24.4 | 12.32 | 92.40 | 0.33 | 1 | 0 | No |
| 217 | 9 | 453.25 | 26.5 | 0.09 | 10 | 18 | 0.8 | 11.53 | 52.90 | 0.55 | 0.6 | 0 | No |
| 218 | 9 | 446.48 | 8.4 | 0.07 | 0 | 33 | 2 | 16.64 | 127.15 | 0.5 | 2.6 | 0 | No |
| 219 | 9 | 415.50 | 65.2 | 0.18 | 4 | 10 | 0.48 | 8.24 | 22.40 | 1 | 0 | 1 | No |
| 220 | 9 | 411.26 | 45.6 | 0.14 | 9 | 33 | 2 | 18.88 | 216.08 | 2.8 | 10.65 | 0 | No |
| 221 | 9 | 416.70 | 45.6 | 0.13 | 9 | 33 | 2 | 17.07 | 114.20 | 0 | 7.05 | 0 | No |
| 222 | 9 | 421.13 | 43.4 | 0.15 | 3 | 69 | 19.2 | 12.09 | 188.00 | 9.38 | 4.8 | 4.58 | No |
| 223 | 9 | 427.34 | 86.4 | 0.26 | 3.3 | 33 | 2 | 10.56 | 100.10 | 3.4 | 2.5 | 0.9 | No |
| 224 | 9 | 421.07 | 71.4 | 0.17 | 9.55 | 41 | 3.38 | 13.50 | 230.38 | 8.52 | 0.4 | 4.1 | No |
| 225 | 9 | 359.79 | 71.1 | 0.37 | 5.9 | 47 | 4.8 | 10.41 | 125.60 | 5.96 | 0 | 5.96 | No |
| 226 | 9 | 413.46 | 45.6 | 0.12 | 11 | 16 | 0.7 | 18.95 | 236.03 | 2.15 | 6.6 | 0 | No |
| 227 | 9 | 402.01 | 75.8 | 0.16 | 9 | 46 | 9 | 20.41 | 227.30 | 2.5 | 5.9 | 0 | No |
| 228 | 9.2 | 75.00 | 75 | 0.31 | 10 | 39 | 3 | 7.41 | 188.30 | 2.74 | 2.3 | 0.9 | No |
| 229 | 7.4 | 20.08 | 17.55 | 0.40 | 2 | 39 | 3 | 41.07 | 26.30 | 0.6 | 0.6 | 0 | No |
| 230 | 7.7 | 84.30 | 25.6 | 0.25 | 2.5 | 22 | 1 | 28.44 | 51.70 | 2.9 | 2.3 | 0.9 | No |
| 231 | 7.7 | 84.30 | 25.6 | 0.25 | 2.5 | 22 | 1 | 23.55 | 60.90 | 2.9 | 2.3 | 0.9 | No |
| 232 | 7.9 | 99.00 | 40 | 0.18 | 4.9 | 54.9 | 7.57 | 14.84 | 63.00 | 2 | 0.6 | 1.4 | No |
| 233 | 7.9 | 129.60 | 110 | 0.20 | 4.9 | 30 | 1.7 | 16.61 | 100.00 | 4.1 | 3.5 | 0.6 | No |
| 234 | 7.9 | 84.42 | 105 | 0.43 | 4.9 | 90 | 71.2 | 18.21 | 99.00 | 4 | 4 | 0 | No |
